# Supplementary material for: Protein Fibrillation under Crowded Conditions
Source: MDPI journal article supplement (doi:10.3390/biom12070950), 2022-07-06
Supplement: s1 [file s1]

Review

# Supplementary Information For: Protein Fibrillation Under Crowded Conditions

Annelise H. Gorensek-Benitez <sup>1</sup>, Bryan Kirk <sup>2</sup> and Jeffrey Myers <sup>3,\*</sup>

<sup>1</sup> Dept. of Chemistry and Biochemistry, Colorado College, Colorado Springs, CO 80903

<sup>2</sup> Dept. of Biology, Davidson College, Davidson, NC 28035

<sup>3</sup> Dept. of Chemistry, Davidson College, Davidson, NC 28035

\* Correspondence: agorensekbenitez@coloradocollege.edu or jemyers@davidson.edu

## Abstract:

Protein amyloid fibrils have widespread implications for human health. Over the last twenty years, fibrillation has been studied using a variety of crowding agents to mimic the packed interior of cells or to probe the mechanisms and pathways of the process. We tabulate and review these results by considering three classes of crowding agent: synthetic polymers, osmolytes and other small molecules, and globular proteins. While some patterns are observable for certain crowding agents, the results are highly variable and often depend on the specific pairing of crowder and fibrillating protein.

**Keywords:** Aggregation, amyloid fibril, excluded volume, molecular crowding, neurodegenerative disease, molecular crowding, osmolyte, polyol, protein fibrillation, proteopathy, synthetic polymer, viscosity

**Table S1.** Abbreviations and average molecular weights for polymers referenced in the text.

| Synthetic Polymer | Numerical Descriptor | Average Molecular weight (Da) |
|-------------------|----------------------|-------------------------------|
| PEG-              | 200                  | 200                           |
|                   | 400                  | 400                           |
|                   | 600                  | 600                           |
|                   | 1000                 | 1000                          |
|                   | 2000                 | 2000                          |
|                   | 3350                 | 3350                          |
|                   | 3500                 | 3500                          |
|                   | 4000                 | 4000                          |
|                   | 4400                 | 4400                          |
|                   | 6000                 | 6000                          |
|                   | 8000                 | 8000                          |
|                   | 10,000               | 10,000                        |
|                   | 20,000               | 20,000                        |
|                   | 200,000              | 200,000                       |
| Ficoll-           | 70                   | 70,000                        |
|                   | 400                  | 400,000                       |
| Dextran-          | 70                   | 70,000                        |
|                   | 100                  | 100,000                       |
|                   | 138                  | 138,000                       |
|                   | 200                  | 200,000                       |
|                   | 250                  | 250,000                       |
|                   | 500                  | 500,000                       |
| HPC               | 100                  | 100,000                       |
|                   | 370                  | 370,000                       |
|                   | 1000                 | 1,000,000                     |
| UCON              | 5400                 | 5400                          |

**Footnotes:** PEG, polyethylene glycol; HPC, hydroxypropylcellulose; UCON is a trade name.

**Table S2.** Effects of macromolecular crowders in intrinsically disordered proteins (IDPs). Table is arranged alphabetically by protein.

| Test Protein        | Cosolute                  | Effect                                                |
|---------------------|---------------------------|-------------------------------------------------------|
| $\alpha$ -synuclein | BSA                       | Promotes fibrillation [1]                             |
|                     | Dextran 70                | Promotes fibrillation [2]                             |
|                     | Dextran 100               | Decreases lag phase and elongation rate [3]           |
|                     | Dextran 138               | Promotes fibrillation [1,4]                           |
|                     | Dextran 200               | Promotes fibrillation [5]                             |
|                     | Dextran 250               | Decreases lag phase and elongation rate [3]           |
|                     | Dextran 500               | Decreases lag phase and elongation rate [3]           |
|                     | Erythritol                | Promotes fibrillation [6]                             |
|                     | Ethylene Glycol           | Promotes fibrillation [4] [6]                         |
|                     | Ficoll 70                 | Promotes fibrillation [1,2,4,7]                       |
|                     | Ficoll 400                | Promotes fibrillation [1,4,7]                         |
|                     | Glucose                   | Promotes fibrillation [5]                             |
|                     | Glycerol                  | Promotes fibrillation [1]                             |
|                     | Glycerol (0.25-2 M)       | Promotes fibrillation [6]                             |
|                     | Glycerol (4.0-6.0 M)      | Hinders fibrillation [6]                              |
|                     | HEWL                      | Promotes fibrillation [1]                             |
|                     | HPC 100                   | Increases lag time and decreases elongation rate [3]  |
|                     | HPC 370                   | Increases lag time and decreases elongation rate [3]  |
|                     | HPC 1000                  | Increases lag time and decreases elongation rate [3]  |
|                     | PEG 200                   | Promotes fibrillation [1,4]                           |
|                     | PEG 400                   | Promotes fibrillation [1,4]                           |
|                     | PEG 600                   | Promotes fibrillation [1,4], Hinders fibrillation [8] |
|                     | PEG 1000                  | Increases lag time and fibrillation rate [8]          |
|                     | PEG 2000                  | Promotes fibrillation [1,2,7]                         |
|                     | PEG 4000                  | Decreases lag time and fibrillation rate [8]          |
|                     | PEG 4400                  | Promotes fibrillation [9]                             |
|                     | Sorbitol                  | Hinders fibrillation [6]                              |
|                     | TMAO                      | Promotes fibrillation [7,10]                          |
|                     | Trehalose                 | Promotes fibrillation [11]                            |
|                     | UCON 5400                 | Hinders fibrillation [9]                              |
|                     | Xylitol (< 2 M)           | Promotes fibrillation [6]                             |
|                     | Xylitol (2 M)             | Hinders fibrillation [6]                              |
| $\gamma$ -synuclein | Erythritol                | Hinders fibrillation [12]                             |
|                     | Ethylene Glycol (< 4.5 M) | Hinders fibrillation [12]                             |

|                              |                           |                                                    |
|------------------------------|---------------------------|----------------------------------------------------|
|                              | Ethylene Glycol (> 4.5 M) | Promotes fibrillation [12]                         |
|                              | Glycerol                  | Hinders fibrillation [12]                          |
|                              | Sorbitol                  | Reduce lag time, increases fibrillation rate [12]  |
|                              | Xylitol                   | Promotes fibrillation [12]                         |
| Histone                      | Dextran 100,000           | Decreases lag phase [3]                            |
|                              | Dextran 250,000           | Decreases lag phase, increases elongation rate [3] |
|                              | Dextran 500,000           | Decreases lag phase, increases elongation rate [3] |
| Histone, pH = 2              | PEG 3500                  | Promotes fibrillation {Citation}                   |
| Histone, pH= 7.5             | PEG 3500                  | Hinders fibrillation                               |
| Tau Protein                  | Dextran 70 (50-100 g/L)   | Promotes fibrillation [13]                         |
|                              | Dextran 70 (100 g/L)      | Hinders fibrillation [13]                          |
|                              | Ficoll 70                 | Promotes fibrillation [13]                         |
|                              | Sucrose                   | Hinders fibrillation [13]                          |
| Phosphorylated Tau 244-441   | Dextran 70                | Promotes fibrillation [14]                         |
|                              | Ficoll 70                 | Promotes Fibrillation [14]                         |
| Unphosphorylated Tau 244-372 | Dextran 70                | Promotes fibrillation [14]                         |
|                              | Ficoll 70                 | Promotes Fibrillation [14]                         |
|                              | PEG 20,000                | Promotes fibrillation [14]                         |
| MET 16                       | Glycerol                  | Hinders fibrillation [15]                          |
|                              | Sorbitol                  | Hinders fibrillation [15]                          |
|                              | Triethylene Glycol        | No effect [15]                                     |
| PI3-SH3                      | Dextran 200               | Promotes fibrillation [5]                          |
|                              | Glucose                   | Promotes fibrillation [5]                          |
| Vλ6 (3HmutWil mutant)        | Glucose                   | Hinders fibrillation [16]                          |
|                              | Sucrose                   | Hinders fibrillation [16]                          |
|                              | Trehalose                 | Hinders fibrillation [16]                          |

**Footnotes.** HEWL, hen egg white lysozyme; PrP, prion protein; HypF-N, N-terminal domain of the *E. coli* HypF protein; PI3-SH3, Src-homology 3 domain of phosphatidylinositol-3-kinase; PEG, polyethylene glycol; HPC, hydroxypropylcellulose; UCON is a trade name.

**Table S3.** Effects of crowding on monomeric globular proteins. Data are arranged by protein name in alphabetical order.

| Test Protein              | Cosolute        | Effect                        |
|---------------------------|-----------------|-------------------------------|
| $\beta$ -lactoglobulin    | Dextran 70      | Promotes fibrillation [17]    |
|                           | PEG 400         | Promotes fibrillation [17]    |
|                           | PEG 8000        | Promotes fibrillation [17]    |
|                           | PEG 20,000      | Promotes fibrillation [17]    |
| Bovine Carbonic Anhydrase | Dextran 70      | Hinders fibrillation [18]     |
|                           | Ficoll 70       | Hinders fibrillation [18]     |
| BSA                       | Glycine Betaine | Promotes Fibrillation [19]    |
|                           | Hydroxyproline  | Hinders fibrillation [19]     |
|                           | Proline         | Hinders fibrillation [19]     |
|                           | Sarcosine       | Hinders fibrillation [19]     |
|                           | Sorbitol        | Hinders fibrillation [19]     |
| HEWL                      | Ascorbic acid   | Hinders fibrillation [20]     |
|                           | Dextran 70      | Hinders fibrillation [14]     |
|                           | Dextran 100     | Decreases elongation rate [3] |
|                           | Dextran 200     | Promotes fibrillation [5]     |
|                           | Dextran 250     | Decreases elongation rate [3] |
|                           | Dextran 500     | Decreases elongation rate [3] |
|                           | Ficoll 70       | Hinders Fibrillation [14]     |
|                           | Glucose         | Hinders fibrillation [5]      |
|                           | Hydroxyproline  | Hinders fibrillation [21]     |
|                           | Proline         | Hinders fibrillation [21]     |
|                           | Sarcosine       | Hinders fibrillation [21]     |
|                           | TMAO            | Promotes fibrillation [7,10]  |
| HEWL, seeded              | PEG 20,000      | Promotes fibrillation [22]    |
| HEWL, unseeded            | PEG 20,000      | Hinders fibrillation [22]     |
| HypF-N                    | Betaine         | Hinders Fibrillation [23]     |
|                           | Glycerol        | Hinders Fibrillation [23]     |
|                           | Proline         | Promotes Fibrillation [23]    |
|                           | Sarcosine       | Hinders Fibrillation [23]     |
|                           | Sucrose         | Hinders Fibrillation [23]     |
|                           | TMAO            | Hinders Fibrillation [23]     |
|                           | Trehalose       | Hinders Fibrillation [23]     |
|                           | Urea            | Hinders Fibrillation [23]     |
| PrP                       | Ectoine         | Hinders fibrillation [24]     |
|                           | Hydroxyectoine  | No effect [24]                |

|                 |            |                            |
|-----------------|------------|----------------------------|
| Human PrP       | Ficoll 70  | Promotes Fibrillation [14] |
|                 | Ficoll 400 | Promotes Fibrillation [14] |
| Human PrP D178N | Ficoll 70  | Promotes Fibrillation [14] |
|                 | Ficoll 400 | Promotes Fibrillation [14] |
| Human PrP E196K | Ficoll 70  | Promotes Fibrillation [14] |
|                 | Ficoll 400 | Promotes Fibrillation [14] |
| Rabbit PrP      | Dextran 70 | Hinders fibrillation [14]  |
|                 | Ficoll 70  | Hinders fibrillation [14]  |
|                 | PEG 20,000 | Hinders fibrillation [14]  |
|                 | PEG 20,000 | Hinders fibrillation [14]  |

**Footnotes.** HEWL, hen egg white lysozyme; PrP, prion protein; HypF-N, N-terminal domain of the *E. coli* HypF protein; PI3-SH3, Src-homology 3 domain of phosphatidylinositol-3-kinase; PEG, polyethylene glycol; HPC, hydroxypropylcellulose; UCON is a trade name.

**Table S4.** Effects of crowding on oligomeric globular proteins. Data are arranged by protein name in alphabetical order.

| Protein               | Cosolute           | Effect                                               |
|-----------------------|--------------------|------------------------------------------------------|
| $\alpha$ -lactalbumin | BSA                | Promotes fibrillation [1]                            |
|                       | Dextran 100        | Increases lag phase, decreases elongation rate [3]   |
|                       | Dextran 250        | Increases lag phase, decreases elongation rate [3]   |
|                       | Ficoll 70          | Promotes Fibrillation [7]                            |
|                       | Fructose           | Hinders fibrillation [25]                            |
|                       | Fructose + Sucrose | Hinders fibrillation [25]                            |
|                       | Glucose            | Hinders fibrillation [25]                            |
|                       | HPC 100            | Increases lag time and decreases elongation rate [3] |
|                       | HPC 370            | Increases lag time and decreases elongation rate [3] |
|                       | HPC 1000           | Increases lag time and decreases elongation rate [3] |
|                       | PEG 3500           | Promotes fibrillation [7]                            |
|                       | Sucrose            | Hinders fibrillation [25]                            |
| Hemoglobin            | Dextran 70         | Promotes fibrillation [26]                           |
|                       | PEG 4000           | Promotes fibrillation [26]                           |
|                       | PEG 6000           | Promotes fibrillation [26]                           |
| Insulin               | Betaine            | Hinders fibrillation [27,28]                         |
|                       | Citrulline         | Hinders fibrillation [27,28]                         |
|                       | Dextran            | Promotes fibrillation [5]                            |
|                       | Ectoine            | Hinders fibrillation [27]                            |
|                       | Fructose           | Hinders fibrillation [29]                            |
|                       | Glucose            | Hinders fibrillation [5] [29]                        |
|                       | Maltose            | Hinders fibrillation [29]                            |
|                       | PEG 4400           | Promotes fibrillation [9]                            |
|                       | Proline            | Hinders fibrillation [28]                            |
|                       | Raffinose          | Hinders fibrillation [29]                            |
|                       | Sorbitol           | Hinders fibrillation [28]                            |
|                       | Sucrose            | Hinders fibrillation [30] [29]                       |
|                       | Trehalose          | Hinders fibrillation [27,29]                         |
|                       | UCON 5400          | Hinders fibrillation [9]                             |
|                       | Urea               | Promotes fibrillation [29]                           |
| Insulin, pH = 2       | Ficoll 70          | Promotes fibrillation [7]                            |
|                       | PEG 2000           | Promotes fibrillation [7]                            |
| Insulin, pH = 2.5     | Dextran 100        | Decreases elongation rate [3]                        |
|                       | Dextran 250        | Decreases elongation rate [3]                        |
|                       | Dextran 500        | Decreases elongation rate [3]                        |

|                   |             |                                                      |
|-------------------|-------------|------------------------------------------------------|
|                   | HPC 100     | Increases lag time and decreases elongation rate [3] |
|                   | HPC 370     | Increases lag time and decreases elongation rate [3] |
|                   | HPC 1000    | Increases lag time and decreases elongation rate [3] |
| Insulin, pH = 7.5 | Dextran 100 | Increases lag phase, decreases elongation rate [3]   |
|                   | Dextran 250 | Increases lag phase, decreases elongation rate [3]   |
|                   | Dextran 500 | Increases lag phase, decreases elongation [3]        |
|                   | Ficoll 70   | Hinders fibrillation [7]                             |
|                   | HPC 100     | Increases lag time and decreases elongation rate [3] |
|                   | HPC 370     | Increases lag time and decreases elongation rate [3] |
|                   | HPC 1000    | Increases lag time and decreases elongation rate     |
|                   | SOD1 A4V    |                                                      |
|                   | Dextran 70  | Promotes fibrillation [14]                           |
|                   | PEG 20,000  | Promotes fibrillation [14]                           |

**Footnotes.** SOD1, superoxide dismutase 1; PEG, polyethylene glycol; HPC, hydroxypropylcellulose; UCON is a trade name.



**Table S5.** Effects of crowding on small peptide hormones. Data are arranged by protein name in alphabetical order.

| Protein               | Cosolute           | Effect                     |
|-----------------------|--------------------|----------------------------|
| Glucagon              | Betaine            | Promotes fibrillation [31] |
|                       | Ectoine            | Promotes fibrillation [31] |
|                       | Glucose            | No effect [31]             |
|                       | Glycerol           | No effect [31]             |
|                       | Glycine Betaine    | Promotes fibrillation [31] |
|                       | Sarcosine          | Promotes fibrillation [31] |
|                       | Sorbitol           | No effect [31]             |
|                       | Sucrose            | No effect [31]             |
|                       | Taurine            | Promotes fibrillation [31] |
|                       | Trehalose          | No effect [31]             |
| hIAPP                 | Betaine            | Hinders fibrillation [32]  |
|                       | BSA                | Hinders fibrillation [33]  |
|                       | Ficoll 70,000      | No effect [33]             |
|                       | HEWL               | Hinders fibrillation [33]  |
|                       | TMAO               | Hinders fibrillation [32]  |
|                       | Urea               | Hinders fibrillation [32]  |
|                       | Dextran 70, 10-20% | No effect [33]             |
|                       | Dextran 70, 30-40% | Hinders fibrillation [33]  |
| Insulin $\beta$ Chain | Dextran 200        | Promotes fibrillation [5]  |
|                       | Glucose            | Promotes fibrillation [5]  |

**Footnotes.** hIAPP, human islet amyloid polypeptide; PEG, polyethylene glycol; HPC, hydroxypropylcellulose; UCON is a trade name.

## References

1. Munishkina, Larissa A.; Cooper, E.M.; Uversky, V.N.; Fink, Anthony L. The Effect of Macromolecular Crowding on Protein Aggregation and Amyloid Fibril Formation. *Journal of Molecular Recognition* **2004**, *17*, 456–464.
2. Shtilerman, M.D.; Ding, T.T.; Lansbury, P.T.J. Molecular Crowding Accelerates Fibrillization of Alpha-Synuclein: Could an Increase in the Cytoplasmic Protein Concentration Induce Parkinson's Disease? *Biochemistry* **2002**, *41*, 3855–3860, doi:10.1021/bi0120906.
3. Breydo, L.; Reddy, K.D.; Piai, A.; Felli, I.C.; Pierattelli, R.; Uversky, V.N. The Crowd You're in with: Effects of Different Types of Crowding Agents on Protein Aggregation. *Biochim Biophys Acta (BBA) - Proteins and Proteomics* **2014**, *1844*, 346–357, doi:10.1016/j.bbapap.2013.11.004.

4. Uversky, V.N.; C. Accelerated  $\alpha$ -Synuclein Fibrillation in Crowded Milieu. *FEBS Letters* **2001**, *515*, 99–103.
5. White, D.A.; B. Protein Aggregation in Crowded Environments. *Journal of the American Chemical Society* **2010**, *132*, 5170–5175.
6. Verma, G.; Singh, P.; Bhat, R. Disorder under Stress: Role of Polyol Osmolytes in Modulating Fibrillation and Aggregation of Intrinsically Disordered Proteins. *Biophysical Chemistry* **2020**, *264*, 106422, doi:10.1016/j.bpc.2020.106422.
7. Munishkina, L.A.; Ahmad, A.; Fink, A.L.; Uversky, V.N. Guiding Protein Aggregation with Macromolecular Crowding. *Biochemistry* **2008**, *47*, 8993–9006, doi:10.1021/bi8008399.
8. Biswas, S.; Bhadra, A.; Lakhera, S.; Soni, M.; Panuganti, V.; Jain, S.; Roy, I. Molecular Crowding Accelerates Aggregation of  $\alpha$ -Synuclein by Altering Its Folding Pathway. *Eur Biophys J* **2021**, *50*, 59–67, doi:10.1007/s00249-020-01486-1.
9. Breydo, L.; Sales, A.E.; Frege, T.; Howell, M.C.; Zaslavsky, B.Y.; Uversky, V.N. Effects of Polymer Hydrophobicity on Protein Structure and Aggregation Kinetics in Crowded Milieu. *Biochemistry* **2015**, *54*, 2957–2966, doi:10.1021/acs.biochem.5b00116.
10. Uversky, V.N.; Li, J.; Fink, A.L. Trimethylamine-N-Oxide-Induced Folding of  $\alpha$ -Synuclein. *FEBS Letters* **2001**, *509*, 31–35, doi:10.1016/S0014-5793(01)03121-0.
11. Naik, V.; Kardani, J.; Roy, I. Trehalose-Induced Structural Transition Accelerates Aggregation of  $\alpha$ -Synuclein. *Molecular Biotechnology* **2016**, *58*, 251–255, doi:10.1007/s12033-016-9923-4.
12. Roy, S.; Bhat, R. Effect of Polyols on the Structure and Aggregation of Recombinant Human  $\gamma$ -Synuclein, an Intrinsically Disordered Protein. *Biochimica et Biophysica Acta (BBA) - Proteins and Proteomics* **2018**, *1866*, 1029–1042, doi:10.1016/j.bbapap.2018.07.003.
13. Wu, Y.; Teng, N.; Li, S. Effects of Macromolecular Crowding and Osmolyte on Human Tau Fibrillation. *International Journal of Biological Macromolecules* **2016**, *90*, 27–36, doi:10.1016/j.ijbiomac.2015.11.091.
14. Ma, Q.; Fan, J.-B.; Zhou, Z.; Zhou, B.-R.; Meng, S.-R.; Hu, J.-Y.; Chen, J.; Liang, Y. The Contrasting Effect of Macromolecular Crowding on Amyloid Fibril Formation. *PLoS One* **2012**, *7*, e36288, doi:10.1371/journal.pone.0036288.
15. Sukenik, S.P.; Regina; Ziserman, Lior; Danino, Dganit; Friedler, Assaf; Harries Daniel Crowding Alone Cannot Account for Cosolute Effect on Amyloid Aggregation. *PLoS ONE* **2011**, *6*, e15608.
16. Abe, M.; Abe, Y.; Ohkuri, T.; Mishima, T.; Monji, A.; Kanba, S.; Ueda, T. Mechanism for Retardation of Amyloid Fibril Formation by Sugars in V $\alpha$ 6 Protein. *Protein Sci* **2013**, *22*, 467–474, doi:10.1002/pro.2228.
17. Ma, B.; Xie, J.; Wei, L.; Li, W. Macromolecular Crowding Modulates the Kinetics and Morphology of Amyloid Self-Assembly by  $\beta$ -Lactoglobulin. *Int J Biol Macromol* **2013**, *53*, 82–87, doi:10.1016/j.ijbiomac.2012.11.008.
18. Mittal, S.; Singh, L.R. Macromolecular Crowding Decelerates Aggregation of a  $\beta$ -Rich Protein, Bovine Carbonic Anhydrase: A Case Study. *J. Biochem.* **2014**, *156*, 273–282.
19. Dasgupta, M.; Kishore, N. Selective Inhibition of Aggregation/Fibrillation of Bovine Serum Albumin by Osmolytes: Mechanistic and Energetics Insights. *PLoS One* **2017**, *12*, e0172208, doi:10.1371/journal.pone.0172208.
20. Patel, P.; Parmar, K.; Patel, D.; Kumar, S.; Trivedi, M.; Das, M. Inhibition of Amyloid Fibril Formation of Lysozyme by Ascorbic Acid and a Probable Mechanism of Action. *Int J Biol Macromol* **2018**, *114*, 666–678, doi:10.1016/j.ijbiomac.2018.03.152.
21. Choudhary, S.; Kishore, N. Addressing Mechanism of Fibrillization/Aggregation and Its Prevention in Presence of Osmolytes: Spectroscopic and Calorimetric Approach. *PLOS ONE* **2014**, *9*, e104600, doi:10.1371/journal.pone.0104600.

- 
22. Kong, L.-X.Z. Effects of Seeding on Lysozyme Amyloid Fibrillation in the Presence of Epigallocatechin and Polyethylene Glycol. *Biochemistry (Moscow)* **2017**, *82*, 266–279.
  23. Bhavsar, R.D.; Prasad, S.; Roy, I. Effect of Osmolytes on the Fibrillation of HypF-N. *Biochimie* **2013**, *95*, 2190–2193, doi:10.1016/j.biochi.2013.07.019.
  24. Kanapathipillai, M.; Ku, S.H.; Girigoswami, K.; Park, C.B. Small Stress Molecules Inhibit Aggregation and Neurotoxicity of Prion Peptide 106–126. *Biochem Biophys Res Commun* **2008**, *365*, 808–813, doi:10.1016/j.bbrc.2007.11.074.
  25. Bashir, S.; Shamsi, A.; Ahmad, F.; Hassan, Md.I.; Kamal, M.A.; Islam, A. Biophysical Elucidation of Fibrillation Inhibition by Sugar Osmolytes in  $\alpha$ -Lactalbumin: Multispectroscopic and Molecular Docking Approaches. *ACS Omega* **2020**, *5*, 26871–26882, doi:10.1021/acsomega.0c04062.
  26. Siddiqui, G.A.; Naeem, A. The Contrasting Effect of Macromolecular Crowding and Confinement on Fibril Formation of Globular Protein: Underlying Cause of Proteopathies. *Journal of Molecular Liquids* **2021**, *322*, 114602, doi:10.1016/j.molliq.2020.114602.
  27. Arora, A.; Ha, C.; Park, C.B. Inhibition of Insulin Amyloid Formation by Small Stress Molecules. *FEBS Lett* **2004**, *564*, 121–125, doi:10.1016/S0014-5793(04)00326-6.
  28. Choudhary, S.; Kishore, N.; Hosur, R.V. Inhibition of Insulin Fibrillation by Osmolytes: Mechanistic Insights. *Scientific Reports* **2015**, *5*, 17599.
  29. Nayak, A.; Lee, C.-C.; McRae, G.J.; Belfort, G. Osmolyte Controlled Fibrillation Kinetics of Insulin: New Insight into Fibrillation Using the Preferential Exclusion Principle. *Biotechnol Prog* **2009**, *25*, 1508–1514, doi:10.1002/btpr.255.
  30. Marasini, C.F. Sucrose Modulates Insulin Amyloid-like Fibril Formation: Effect on the Aggregation Mechanism and Fibril Morphology. *RSC Advances* **2017**, *7*, 10487–10493.
  31. Macchi, F.E.; Maiké; Kiefer, Hans; Otzen, Daniel E. The Effect of Osmolytes on Protein Fibrillation. *International Journal of Biological Macromolecules* **2012**, *13*, 3801–3819.
  32. Seeliger, J.; Estel, K.; Erwin, N.; Winter, R. Cosolvent Effects on the Fibrillation Reaction of Human IAPP. *Phys Chem Chem Phys* **2013**, *15*, 8902–8907, doi:10.1039/c3cp44412k.
  33. Seeliger, J.; Werkmüller, A.; Winter, R. Macromolecular Crowding as Suppressor of Human IAPP Fibril Formation and Cytotoxicity. *PLoS ONE* **2013**, *8*, e69652.
-
